# Supplementary material for: Source attribution using FLEXPART and carbon monoxide emission inventories: SOFT-IO version 1.0
Source: Copernicus journal article supplement (doi:10.5194/acp-17-15271-2017), 2017-12-22
Supplement: Supplementary file 1 [file acp-17-15271-2017-supplement.pdf]

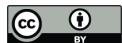

*Supplement of*

## **Source attribution using FLEXPART and carbon monoxide emission inventories: SOFT-IO version 1.0**

**Bastien Sauvage et al.**

*Correspondence to:* Bastien Sauvage ([bastien.sauvage@aero.obs-mip.fr](mailto:bastien.sauvage@aero.obs-mip.fr))

The copyright of individual parts of the supplement might differ from the CC BY 4.0 License.

## Supplements

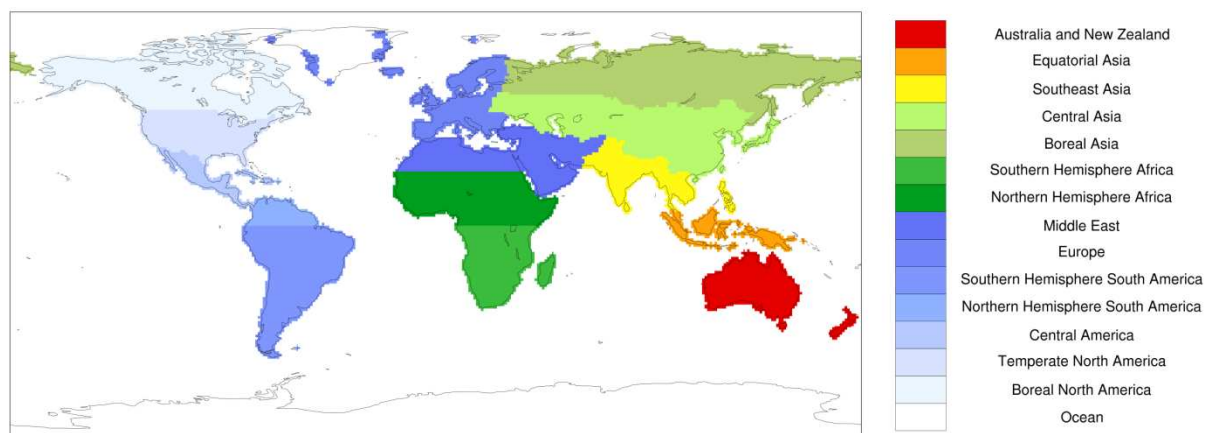

**Figure S1:** regions used to discriminate CO origin calculated with SOFT-IO, from <http://www.globalfiredata.org/data.html>

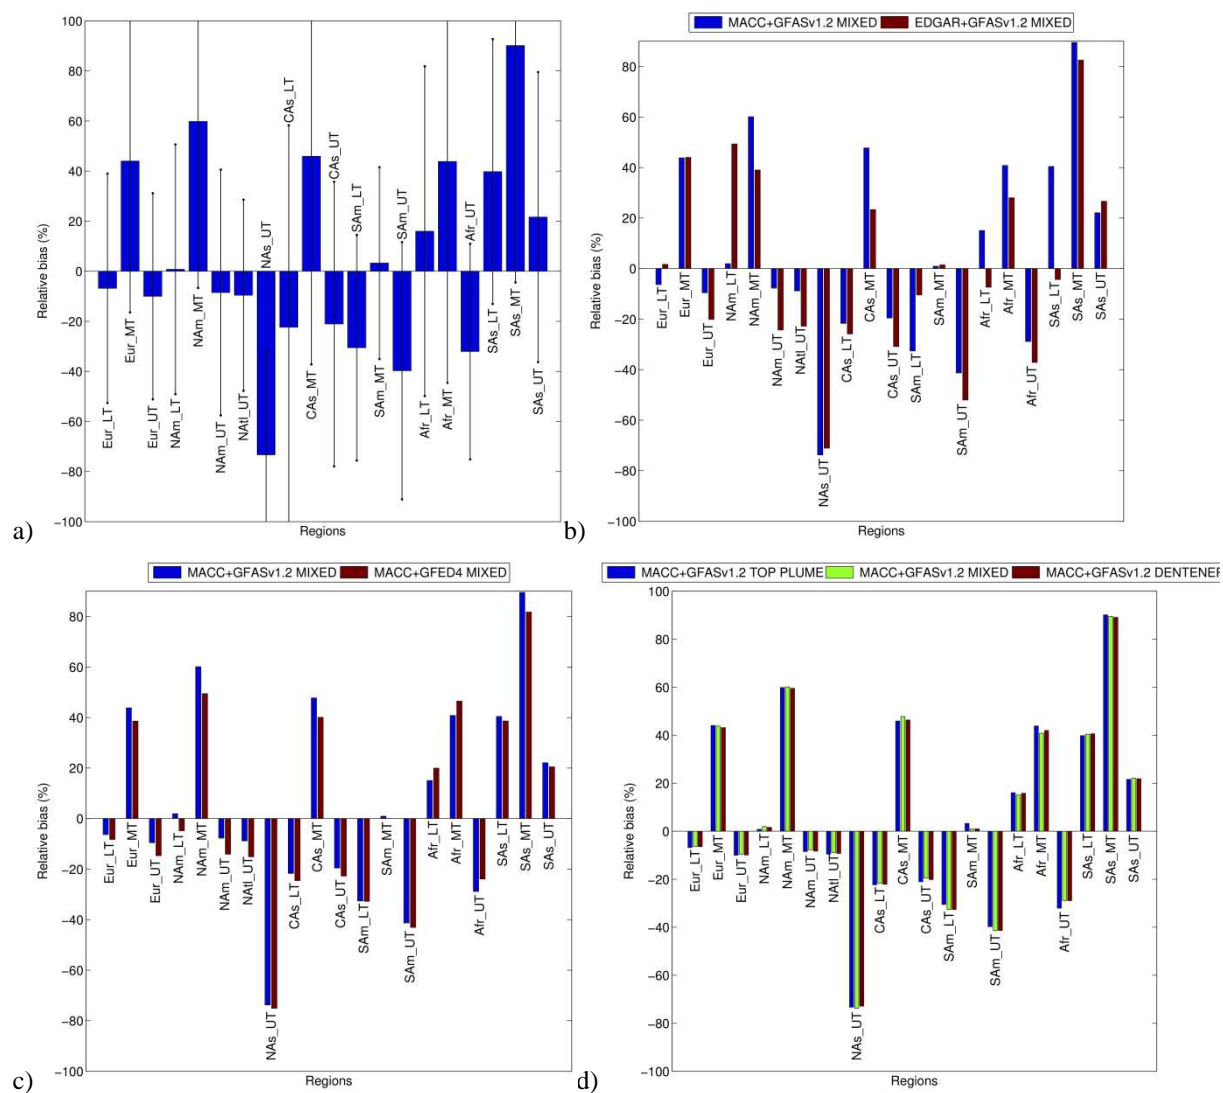

**Figure S2: Same as Figs. 10a, 12b, 13b and 13d (a, b, c, d respectively) but for relative bias (%)**
